# Supplementary material for: Unsupervised Clustering of Subcellular Protein Expression Patterns in High-Throughput Microscopy Images Reveals Protein Complexes and Functional Relationships between Proteins
Source: PLoS Comput Biol. 2013 Jun 13;9(6):e1003085. doi: 10.1371/journal.pcbi.1003085 (PMC3681667; doi:10.1371/journal.pcbi.1003085)
Supplement: Table S2 — Enrichment of subcellular localization in hierarchical clustering results. For each subcellular location, the inner cluster that shows the most significant enrichment was identified within the hierarchical clusters. For 6 hierarchical clustering results, a P-value is reported for the significance of the enrichment of each localization class. The enrichments were computed for ‘pure’ patterns, and ‘partial’ patterns. (XLSX) [file pcbi.1003085.s009.xlsx]

## Sheet: Sheet1
	Log10 Pvalues of Best Cluster per localization annotation
Metric:	Maximum likelihood Clustering		Euclidean, Complete Linkage		Correlation, Complete Linkage
Confidence use:	Weighted	0.8 Threshold	Weighted	0.8 Threshold	Weighted	0.8 Threshold
Pure Localization: (according to Huh et al. 2003)
ER	-79.8486	-36.0812	-70.9416	-64.4746	-86.0145	-91.7971
ER to Golgi	-4.22971	-3.49969	-5.87723	-5.72776	-5.72776	-8.14175
Golgi	-9.48532	-4.88266	-7.24803	-6.0729	-5.48106	-5.83084
actin	-10.9712	-5.56616	-14.8531	-13.5527	-13.5793	-13.6019
ambiguous	-26.8945	-19.6749	-36.2859	-21.6865	-28.9564	-32.0299
bud neck	-21.7764	-4.88266	-7.5775	-9.94269	-10.3579	-17.8249
cell periphery	-60.6843	-14.2444	-53.3296	-62.5054	-26.0381	-23.7099
cytoplasm	-81.1546	-67.5055	-48.2936	-61.052	-99.3022	-67.4009
early Golgi	-6.56028	-4.46415	-5.07181	-4.16544	-4.27412	-5.16134
endosome	-12.0717	-5.22802	-16.972	-11.4668	-15.1921	-14.7308
late Golgi	-10.094	-10.3811	-7.77676	-12.788	-7.30208	-8.88736
lipid particle	-12.4019	-3.89516	-7.81897	-9.44073	-10.1223	-10.0684
microtubule	-5.25064	-2.93942	-5.25064	-3.7978	-5.90255	-5.55517
mitochondrion	-129.64	-43.2798	-77.5938	-42.7344	-129.378	-110.441
nuclear periphery	-23.1219	-10.3312	-16.1606	-17.5299	-18.9282	-29.0505
nucleolus	-33.9539	-26.6233	-39.0217	-42.1109	-51.6188	-57.1952
nucleus	-176.373	-125.665	-131.077	-89.7097	-247.861	-227.023
peroxisome	-14.6634	-4.77031	-15.1475	-7.1965	-14.6634	-14.6634
punctate composite	-7.21718	-4.82522	-10.1364	-8.32208	-6.59317	-8.03861
spindle pole	-21.0676	-11.3412	-28.525	-17.8866	-38.09	-31.7698
vacuolar membrane	-33.9921	-14.7534	-49.0614	-35.8112	-56.64	-54.8252
vacuole	-39.4633	-15.3581	-65.9744	-38.6209	-36.2138	-40.6113
Sum of log Pvalues	-820.916	-440.193	-719.995	-586.596	-918.237	-878.358
Partial Localization: (according to Huh et al. 2003)
ER	-79.188	-39.2189	-70.7368	-66.2906	-85.8336	-90.3914
ER to Golgi	-4.22971	-3.49969	-5.87723	-5.72776	-5.72776	-8.14175
Golgi	-21.5859	-9.02601	-21.6411	-17.4156	-21.0846	-12.2652
actin	-11.9499	-5.22883	-16.5575	-16.6047	-14.8928	-14.656
ambiguous	-38.7024	-17.6965	-32.9105	-24.1333	-31.2329	-38.032
bud	-34.7256	-19.0588	-22.8496	-32.3095	-21.0848	-31.5521
bud neck	-63.2027	-19.0258	-32.4636	-32.328	-23.3155	-36.9905
cell periphery	-103.036	-17.6882	-56.337	-78.7439	-24.174	-25.4714
cytoplasm	-187.254	-135.207	-75.3776	-57.3956	-129.136	-111.602
early Golgi	-38.8379	-17.512	-19.9112	-26.3831	-35.6124	-17.1836
endosome	-13.1205	-4.71579	-21.8457	-10.9753	-16.7607	-17.9674
late Golgi	-10.7727	-12.9381	-8.10794	-14.4299	-7.46199	-11.6716
lipid particle	-11.8324	-4.79408	-9.33906	-9.08193	-9.66194	-9.50228
microtubule	-5.59188	-4.31081	-5.39784	-9.26629	-5.84567	-5.70929
mitochondrion	-129.287	-41.9818	-74.389	-46.5622	-125.873	-104.22
nuclear periphery	-21.8656	-9.05857	-17.1857	-17.6392	-19.2595	-26.225
nucleolus	-80.627	-37.3573	-84.7843	-72.8118	-136.306	-125.626
nucleus	-109.268	-73.252	-112.126	-124.365	-209.032	-246.637
peroxisome	-14.6634	-4.77031	-15.1475	-7.1965	-14.6634	-14.6634
punctate composite	-15.0603	-12.8556	-11.3051	-8.90449	-11.3081	-8.06388
spindle pole	-19.0397	-6.53236	-24.6337	-21.247	-37.117	-30.7982
vacuolar membrane	-37.1547	-17.8618	-52.446	-37.5095	-60.8769	-60.5743
vacuole	-34.8294	-12.9274	-60.2056	-35.9513	-37.9647	-41.5231
Sum of log Pvalues	-1085.83	-526.518	-851.575	-773.272	-1084.23	-1089.47
