# Supplementary material for: Unsupervised Clustering of Subcellular Protein Expression Patterns in High-Throughput Microscopy Images Reveals Protein Complexes and Functional Relationships between Proteins
Source: PLoS Comput Biol. 2013 Jun 13;9(6):e1003085. doi: 10.1371/journal.pcbi.1003085 (PMC3681667; doi:10.1371/journal.pcbi.1003085)
Supplement: Table S3 — Significance of functional annotation enrichment in the hierarchical clustering results. For each annotation, the most significant enrichment among the cluster found within the hierarchical clustering results was evaluated using the Hypergeometric distribution. The sums of the log P-value (Log pvalue sum) were computed for various sets of functional annotations. For example, GO 19–24 is the GO annotations assigned to between 19 and 24 proteins in our set of 4004. Pfam and Complexes indicate the annotations of Pfam domains and protein complexes. The significance of sums of log P-values were evaluated by generating the background distribution of sum of log P-value occurring by permuting the proteins in the hierarchical clusters. To reject that the enrichments are explained by enrichments in subcellular location alone, we constrained the permutation to only protein of identical assessment by Huh et al. [14]. In all cases, 10000 permutations never generated values for the ‘S’ statistics that were as extreme as observed in the original hierarchical clustering results. For that reason, significance is also reported as a Z-score although the background distribution is not necessarily a Normal distribution. Using a different metric or defining time-profiles using only cells with confidence score above a threshold cells produces similar observations. (XLSX) [file pcbi.1003085.s010.xlsx]

## Sheet: Sheet1
*Pvalues obtained by bounding the tail probability usein the forth central momment of the background distribution
**Ribosomal and Proteosome Annotations Excluded
***Under the permutation constraint, the sum of of log Pvalue is unchanged, hence the standard deviation of the background score is zero.
Maximum Likelihood cluster, Condfidence Weighted								Maximum Likelihood cluster, 0.8 Condfidence Threshold
	Number of Annotations	Log10 Pvalue sum	Unconstrained Permutation		Huh et al. Constrained Permutation				Number of Annotations	Log10 Pvalue sum	Unconstrained Permutation		Huh et al. Constrained Permutation
			Z-score	Empirical Pvalue	Z-score	Empirical Pvalue					Z-score	Empirical Pvalue	Z-score	Empirical Pvalue
GO_ALL	2134	-7078.58	-80.2054	0.0001	-31.9067	0.0001		GO_ALL	2134	-5228.23	-44.9559	0.0001	-20.9096	0.0001
Complexes	277	-988.918	-40.4751	0.0001	-19.4952	0.0001		Complexes	277	-751.829	-26.0838	0.0001	-13.7544	0.0001
Complexes**	262	-932.945	-39.5005	0.0001	-18.5996	0.0001		Complexes**	262	-707.659	-25.476	0.0001	-13.0954	0.0001
Pfam	761	-1661.31	-31.71	0.0001	-17.1283	0.0001		Pfam	761	-1317.45	-19.3698	0.0001	-11.1184	0.0001
Pfam**	688	-1490.51	-28.4291	0.0001	-14.4963	0.0001		Pfam**	688	-1192.67	-17.764	0.0001	-9.94195	0.0001
GO 2	664	-827.963	-18.3343	0.0001	-10.0844	0.0001		GO 2	664	-636.506	-10.1245	0.0001	-6.2229	0.0001
GO 3	337	-704.499	-20.3726	0.0001	-9.27627	0.0001		GO 3	337	-565.32	-12.6048	0.0001	-6.29679	0.0001
GO 4-5	379	-1072.37	-28.0637	0.0001	-13.5014	0.0001		GO 4-5	379	-846.634	-17.0499	0.0001	-9.19936	0.0001
GO 6-7	203	-789.636	-30.4319	0.0001	-14.7176	0.0001		GO 6-7	203	-582.868	-16.8842	0.0001	-8.45785	0.0001
GO 8-9	113	-480.772	-25.1589	0.0001	-12.0772	0.0001		GO 8-9	113	-352.638	-13.5127	0.0001	-6.11195	0.0001
GO 10-11	76	-360.014	-24.6537	0.0001	-11.9578	0.0001		GO 10-11	76	-279.611	-14.799	0.0001	-7.82999	0.0001
GO 12-14	82	-452.976	-29.0628	0.0001	-13.0656	0.0001		GO 12-14	82	-348.773	-18.0605	0.0001	-9.26708	0.0001
GO 15-18	73	-417.326	-28.4328	0.0001	-12.294	0.0001		GO 15-18	73	-301.62	-14.8215	0.0001	-6.30103	0.0001
GO 19-24	71	-471.11	-37.4667	0.0001	-15.1735	0.0001		GO 19-24	71	-332.84	-19.7124	0.0001	-9.51206	0.0001
GO 25-34	49	-340.913	-35.6476	0.0001	-10.1194	0.0001		GO 25-34	49	-264.402	-22.0389	0.0001	-10.4417	0.0001
GO 35-49	32	-274.098	-44.3936	0.0001	-13.5739	0.0001		GO 35-49	32	-183.54	-21.5952	0.0001	-9.20543	0.0001
GO 50-79	29	-296.519	-60.9922	0.0001	-13.2872	0.0001		GO 50-79	29	-199.299	-31.9368	0.0001	-10.5256	0.0001
GO 80-200	18	-388.685	-151.951	0.0001	-8.22341	0.0001		GO 80-200	18	-194.838	-65.3604	0.0001	-5.17871	0.0001
GO 200+	8	-201.701	-120.955	0.0001	-11.322	0.0001		GO 200+	8	-139.34	-78.4223	0.0001	-9.07925	0.0001
Pure Localization	22	-820.916	-219.833	0.0001	NaN***			Pure Localization	22	-440.193	-110.081	0.0001	NaN***
Partial Localization	23	-1085.83	-319.066	0.0001	NaN***			Partial Localization	23	-526.518	-143.212	0.0001	NaN***
Euclidean, Complete Linkage, Condfidence Weighted								Euclidean, Complete Linkage, 0.8 Condfidence Threshold
	Number of Annotations	Log10 Pvalue sum	Unconstrained Permutation		Huh et al. Constrained Permutation				Number of Annotations	Log10 Pvalue sum	Unconstrained Permutation		Huh et al. Constrained Permutation
			Z-score	Empirical Pvalue	Z-score	Empirical Pvalue					Z-score	Empirical Pvalue	Z-score	Empirical Pvalue
GO_ALL	2134	-6636.11	-74.3495	0.0001	-27.9032	0.0001		GO_ALL	2134	-6451.37	-69.9604	0.0001	-28.1598	0.0001
Complexes	277	-963.973	-39.4875	0.0001	-18.6272	0.0001		Complexes	277	-926.786	-37.1217	0.0001	-17.9734	0.0001
Complexes**	262	-911.799	-38.8018	0.0001	-17.8103	0.0001		Complexes**	262	-871.988	-36.1819	0.0001	-17.0725	0.0001
Pfam	761	-1545.28	-29.3373	0.0001	-13.5346	0.0001		Pfam	761	-1585.94	-28.5806	0.0001	-14.1462	0.0001
Pfam**	688	-1386.63	-26.2524	0.0001	-11.5321	0.0001		Pfam**	688	-1355.21	-24.6325	0.0001	-11.3064	0.0001
GO 2	664	-747.854	-16.2527	0.0001	-7.77569	0.0001		GO 2	664	-740.678	-15.5397	0.0001	-7.79349	0.0001
GO 3	337	-674.288	-20.0653	0.0001	-8.66186	0.0001		GO 3	337	-674.895	-19.8454	0.0001	-9.10446	0.0001
GO 4-5	379	-1008.32	-26.0041	0.0001	-11.519	0.0001		GO 4-5	379	-1000.14	-25.3532	0.0001	-12.0913	0.0001
GO 6-7	203	-768.369	-29.8083	0.0001	-13.4191	0.0001		GO 6-7	203	-747.549	-28.1942	0.0001	-13.1225	0.0001
GO 8-9	113	-482.741	-25.7753	0.0001	-12.433	0.0001		GO 8-9	113	-479.361	-25.6076	0.0001	-12.9385	0.0001
GO 10-11	76	-355.43	-24.2177	0.0001	-11.2527	0.0001		GO 10-11	76	-363.421	-24.8707	0.0001	-13.2851	0.0001
GO 12-14	82	-412.64	-24.8902	0.0001	-10.4258	0.0001		GO 12-14	82	-404.316	-23.8224	0.0001	-10.1568	0.0001
GO 15-18	73	-359.234	-21.8399	0.0001	-7.47445	0.0001		GO 15-18	73	-366.033	-22.368	0.0001	-8.89591	0.0001
GO 19-24	71	-471.681	-37.2452	0.0001	-15.9435	0.0001		GO 19-24	71	-441.81	-33.1008	0.0001	-15.2171	0.0001
GO 25-34	49	-350.076	-36.417	0.0001	-10.2931	0.0001		GO 25-34	49	-327.498	-32.2686	0.0001	-10.3703	0.0001
GO 35-49	32	-244.916	-36.3423	0.0001	-10.8073	0.0001		GO 35-49	32	-231.016	-32.8834	0.0001	-10.828	0.0001
GO 50-79	29	-270.221	-51.922	0.0001	-11.9503	0.0001		GO 50-79	29	-243.172	-44.3882	0.0001	-10.5181	0.0001
GO 80-200	18	-359.921	-141.472	0.0001	-7.47916	0.0001		GO 80-200	18	-326.037	-127.766	0.0001	-8.31662	0.0001
GO 200+	8	-130.421	-72.8458	0.0001	-6.27167	0.0001		GO 200+	8	-105.444	-54.8867	0.0001	-4.83864	0.0001
Pure Localization	22	-719.995	-189.208	0.0001	NaN***			Pure Localization	22	-586.596	-150.36	0.0001	NaN***
Partial Localization	23	-851.575	-242.015	0.0001	NaN***			Partial Localization	23	-773.272	-220.213	0.0001	NaN***
Correlation Metric, Complete Linkage, Condfidence Weighted								Correlation Metric, Complete Linkage, 0.8 Condfidence Threshold
	Number of Annotations	Log10 Pvalue sum	Unconstrained Permutation		Huh et al. Constrained Permutation				Number of Annotations	Log10 Pvalue sum	Unconstrained Permutation		Huh et al. Constrained Permutation
			Z-score	Empirical Pvalue	Z-score	Empirical Pvalue					Z-score	Empirical Pvalue	Z-score	Empirical Pvalue
GO_ALL	2134	-6903.95	-78.8392	0.0001	-26.9638	0.0001		GO_ALL	2134	-6711.71	-73.3841	0.0001	-24.6814	0.0001
Complexes	277	-992.304	-41.3889	0.0001	-17.3301	0.0001		Complexes	277	-978.952	-40.3304	0.0001	-17.2092	0.0001
Complexes**	262	-943.106	-40.9656	0.0001	-16.66	0.0001		Complexes**	262	-929.584	-39.6044	0.0001	-16.4885	0.0001
Pfam	761	-1562.14	-28.2061	0.0001	-13.6255	0.0001		Pfam	761	-1566.07	-27.4143	0.0001	-12.5273	0.0001
Pfam**	688	-1396.51	-25.3741	0.0001	-11.537	0.0001		Pfam**	688	-1385.06	-25.178	0.0001	-11.0561	0.0001
GO 2	664	-805.486	-18.3344	0.0001	-8.89394	0.0001		GO 2	664	-737.008	-14.5997	0.0001	-6.32292	0.0001
GO 3	337	-631.8	-17.2121	0.0001	-6.31969	0.0001		GO 3	337	-681.155	-19.8634	0.0001	-7.96028	0.0001
GO 4-5	379	-1035.7	-27.6326	0.0001	-11.8217	0.0001		GO 4-5	379	-1015.95	-26.1315	0.0001	-11.0952	0.0001
GO 6-7	203	-747.943	-28.3461	0.0001	-11.6749	0.0001		GO 6-7	203	-722.239	-26.2329	0.0001	-10.6593	0.0001
GO 8-9	113	-469.326	-24.396	0.0001	-10.2994	0.0001		GO 8-9	113	-468.683	-24.5776	0.0001	-10.2922	0.0001
GO 10-11	76	-383.526	-27.2291	0.0001	-12.8144	0.0001		GO 10-11	76	-360.929	-24.5927	0.0001	-10.6576	0.0001
GO 12-14	82	-447.332	-28.1888	0.0001	-10.9712	0.0001		GO 12-14	82	-422.178	-25.9016	0.0001	-9.84875	0.0001
GO 15-18	73	-420.572	-28.5771	0.0001	-11.194	0.0001		GO 15-18	73	-382.773	-24.4332	0.0001	-8.29363	0.0001
GO 19-24	71	-488.339	-39.5561	0.0001	-12.2965	0.0001		GO 19-24	71	-475.002	-37.551	0.0001	-12.0211	0.0001
GO 25-34	49	-386.002	-42.4649	0.0001	-8.84282	0.0001		GO 25-34	49	-376.697	-40.8794	0.0001	-8.7593	0.0001
GO 35-49	32	-262.06	-40.921	0.0001	-9.65558	0.0001		GO 35-49	32	-254.584	-38.1278	0.0001	-9.77447	0.0001
GO 50-79	29	-286.405	-57.4738	0.0001	-10.768	0.0001		GO 50-79	29	-290.119	-58.2627	0.0001	-11.3456	0.0001
GO 80-200	18	-422.367	-171.995	0.0001	-6.83484	0.0001		GO 80-200	18	-409.087	-165.101	0.0001	-6.88453	0.0001
GO 200+	8	-117.084	-63.7764	0.0001	-1.95609	0.0277		GO 200+	8	-115.31	-62.22	0.0001	-0.675	0.2791
Pure Localization	22	-918.237	-245.065	0.0001	NaN***			Pure Localization	22	-878.358	-237.748	0.0001	NaN***
Partial Localization	23	-1084.23	-314.393	0.0001	NaN***			Partial Localization	23	-1089.47	-320.702	0.0001	NaN***
