# Supplementary material for: Unsupervised Clustering of Subcellular Protein Expression Patterns in High-Throughput Microscopy Images Reveals Protein Complexes and Functional Relationships between Proteins
Source: PLoS Comput Biol. 2013 Jun 13;9(6):e1003085. doi: 10.1371/journal.pcbi.1003085 (PMC3681667; doi:10.1371/journal.pcbi.1003085)
Supplement: Table S6 — List of Dynamic Bud Proteins. For each protein from figure 8, the Huh et al. [14] subcellular location, the revised location proposed by Chen et al. [16] and the Cellular compartment from SGD [45] is reported. We note that proteins that are not identified to be bud neck or actin by Huh et al. typically have subcellular location that disagree between annotation sources. (XLSX) [file pcbi.1003085.s013.xlsx]

## Sheet: Sheet1
	ORF	Name	Huh et al. 2003 Subcellular location	Chen et al. 2009 Subcellular location	not actin, bud or bud neck localized (by Huh et al. or Chen et al.)	SGD Cell Compatement Annotation: (Only manually curated annotations are shown. If unavailable, * for High throughput and ** for Huh et al.)
	YMR109W	MYO5	actin	actin		actin cortical patch
	YJL021C	BBC1	actin	actin		actin cortical patch
	YER114C	BOI2	bud neck,cytoplasm,cell periphery,punc. c.,bud	N/A		cellular bud, cellular bud neck, site of polarized growth
	YDR388W	RVS167	actin	actin		actin, mating projection tip
	YBL105C	PKC1	ambiguous,bud neck,cytoplasm,bud	N/A		cytoplasm, cytoskeleton, nucleus, site of polarized growth
	YER166W	DNF1	late Golgi	ER	X	plasma membrane
	YKR100C	SKG1	cell periphery,bud	N/A		cellular bud tip, incipient cellular bud site
	YDR348C	YDR348C	bud neck,cell periphery	N/A		cell cortex
	YIR003W	AIM21	actin	actin		mating projection tip*, (colocalized) ribosome*, actin cytoskeleton**
	YOR304C-A	YOR304C-A	ambiguous,bud neck,cytoplasm,cell periphery,bud	N/A		mating projection tip*, cytoplasm*, cellular bud**,cellular bud neck**
	YBL085W	BOI1	bud neck,cytoplasm,cell periphery,bud	N/A		cellular bud, cellular bud neck, site of polarized growth
	YLR319C	BUD6	bud neck,cytoplasm,cell periphery	N/A		cellular bud neck, cellular bud tip, incipient cellular bud site, mating projection tip, polarisome, spindle pole body
	YBR200W	BEM1	ambiguous,bud neck,cell periphery,bud	N/A		cellular bud neck, cellular bud tip, incipient cellular bud site, mating projection tip
	YLR187W	SKG3	ambiguous,bud neck,cytoplasm,cell periphery,bud	N/A		cellular bud neck*, cellular bud tip*, cellular bud**, cytoplasm**
	YAL024C	LTE1	cytoplasm	cytoplasm	X	cellular bud
	YDL240W	LRG1	bud neck,cytoplasm,cell periphery	N/A		mitochondrion*, cellular bud neck**, cytoplasm**
	YOR127W	RGA1	bud neck,cytoplasm,cell periphery	N/A		cellular bud neck split septin rings
	YKL092C	BUD2	bud neck,cytoplasm,cell periphery	N/A		intracellular
	YKR090W	PXL1	ambiguous,bud neck,cytoplasm,cell periphery,bud	N/A		cellular bud neck, cellular bud tip, incipient cellular bud site, mating projection tip
	YGL233W	SEC15	bud neck,cytoplasm,cell periphery	N/A		cellular bud neck, cellular bud tip, incipient cellular bud site, exocyst
	YKL079W	SMY1	ambiguous,cytoplasm,bud	N/A		cellular bud neck, cellular bud tip, incipient cellular bud site, mating projection tip
	YNL271C	BNI1	bud neck,cytoplasm	N/A		cellular bud neck, cellular bud tip, incipient cellular bud site, mating projection tip, actin filament, polarisome
	YBR260C	RGD1	ambiguous,bud neck,cytoplasm,bud	N/A		actin cortical patch, cellular bud
	YPL115C	BEM3	bud neck,cytoplasm	N/A		cellular bud tip, cytoplasm, incipient cellular bud site, mating projection tip, cell cortex
	YNL298W	CLA4	ambiguous,cytoplasm,cell periphery,bud	N/A		cellular bud, fungal-type vacuole, nucleus
	YHR114W	BZZ1	actin	ER		actin cortical patch
	YBR007C	DSF2	ambiguous	cytoplasm	X	cellular bud tip*
	YOR188W	MSB1	bud neck,cytoplasm	N/A		cellular bud neck, cellular bud tip
	YMR273C	ZDS1	cytoplasm	cytoplasm	X	cellular bud neck, cellular bud tip, cytoplasm, nuclear pore
	YNR049C	MSO1	ambiguous,bud neck,cytoplasm,bud	N/A		SNARE complex, cellular bud membrane, cellular bud neck, cellular bud tip, plasma membrane, prospore membrane
	YOR329C	SCD5	ambiguous	cytoplasm	X	actin cortical patch, nucleus
	YNL293W	MSB3	ambiguous	cytoplasm	X	cellular bud tip, polarisome, incipient cellular bud site
	YDL203C	ACK1	ambiguous	cytoplasm	X	mitochondrion*
	YNL106C	INP52	actin	mitochondrion		actin cortical patch, cytoplasm
	YAL053W	FLC2	ambiguous,bud neck,cell peri.,punc. c.,late Golgi,bud	N/A		endoplasmic reticulum
	YNL020C	ARK1	actin	peroxisome		actin cortical patch
	YDL161W	ENT1	actin	ER		actin cortical patch
	YNL084C	END3	punctate composite	actin		actin cortical patch
	YHR161C	YAP1801	ambiguous,bud neck,cell periphery,bud	N/A		actin cortical patch
	YOR181W	LAS17	actin	actin		actin cortical patch
	YNL161W	CBK1	bud neck,cytoplasm	N/A		cell cortex, cellular bud, cellular bud neck, cellular bud tip, cytoplasm, incipient cellular bud site, mating projection tip, nucleus
	YMR266W	RSN1	cell periphery	cell periphery	X	membrane
	YLR337C	VRP1	punctate composite,actin	N/A		actin cortical patch, cellular bud neck, incipient cellular bud site
	YDL122W	UBP1	cytoplasm	cytoplasm	X	cytoplasm, ER
	YPL207W	TYW1	ER	cell periphery	X	ER**
	YLR084C	RAX2	bud neck,cell periphery	N/A		cellular bud neck, cellular bud scar, membrane
	YOR094W	ARF3	cell periphery	cell periphery	X	cellular bud neck, cellular bud tip
	YNL258C	DSL1	ER	ER	X	Dsl1p complex, endoplasmic reticulum, nucleus, (colocalized) peroxisome
	YDL173W	YDL173W	cytoplasm	cell periphery	X	cytoplasm**
	YBR052C	RFS1	punctate composite	cell periphery	X	cytoplasm, (colocalized) Membrane raft
	YPR156C	TPO3	cell periphery	cell periphery	X	fungal-type vacuole membrane, plasma membrane
	YDL025C	RTK1	ambiguous	cytoplasm	X	N/A
	YJR091C	JSN1	ambiguous	cell periphery	X	external side of mitochondrial outer membrane
	YCL014W	BUD3	bud neck	mitochondrion		cellular bud neck contractile ring, cellular bud neck
	YJR092W	BUD4	bud neck	endosome		cellular bud neck contractile ring
	YKL101W	HSL1	bud neck	bud neck		cellular bud neck, septin ring
	YHR023W	MYO1	bud neck	cytoplasm		cellular bud neck, (colocalized) cellular bud neck contractile ring, incipient cellular bud site, myosin II complex
	YIL140W	AXL2	ambiguous,bud neck,cell periphery,vacuole,bud	N/A		cellular bud neck, integral to plasma membrane, septin ring
	YHR149C	SKG6	bud neck,cytoplasm,cell periphery,bud	N/A		cellular bud neck, cellular bud tip, incipient cellular bud site, integral to membrane, cell cortex
	YNL078W	NIS1	bud neck,cell periphery	N/A		cellular bud neck, nucleus
	YMR204C	INP1	peroxisome	mitochondrion	X	extrinsic to intraperoxisomal membrane
	YMR032W	HOF1	bud neck	cytoplasm		cellular bud neck contractile ring, cellular bud neck septin ring
	YDR239C	YDR239C	cytoplasm	cytoplasm	X	(colocalized) ribosome*, cytoplasm**
	YPL074W	YTA6	cytoplasm	cytoplasm	X	cell cortex
	YBL086C	YBL086C	cell periphery	mitochondrion	X	N/A
	YHL026C	YHL026C	ambiguous	cell periphery	X	N/A
	YER032W	FIR1	bud neck	mitochondrion		cellular bud neck**
	YIL154C	IMP2'	cytoplasm	cytoplasm	X	cytoplasm**
	YPR122W	AXL1	bud neck,cell periphery	N/A		cellular bud neck, mating projection tip*
	YOL062C	APM4	bud neck,cell periphery	N/A		AP-2 adaptor complex
	YNL233W	BNI4	bud neck,cytoplasm,cell periphery	N/A		cellular bud neck, cellular bud neck septin collar, incipient cellular bud site, septin ring
	YPL158C	YPL158C	bud neck	cytoplasm		cellular bud neck*, cellular bud tip*
	YJR058C	APS2	bud neck,cell periphery	N/A		AP-2 adaptor complex, clathrin-coated vesicle
	YIL159W	BNR1	bud neck	mitochondrion		cellular bud neck
	YPR188C	MLC2	bud neck	cytoplasm		cellular bud neck contractile ring
	YKL048C	ELM1	bud neck	cytoplasm		cellular bud neck contractile ring
	YCL024W	KCC4	ambiguous,bud neck,cell periphery,bud	N/A		cellular bud neck, cellular bud neck septin collar, incipient cellular bud site, plasma membrane, septin ring
	YDL028C	MPS1	bud neck	cytoplasm		condensed nuclear chromosome kinetochore, spindle pole body
	YCR038C	BUD5	bud neck,cell periphery	N/A		cellular bud neck, incipient cellular bud site
	YGR238C	KEL2	ambiguous,cell periphery,bud	N/A		cellular bud neck, cellular bud tip, mating projection tip
	YIL068C	SEC6	ambiguous,bud neck,cell periphery,bud	N/A		cellular bud neck, cellular bud tip, exocyst
	YDR166C	SEC5	ambiguous,bud neck,cell periphery,bud	N/A		cellular bud neck, cellular bud tip, exocyst, incipient cellular bud site
	YJL085W	EXO70	bud neck,cell periphery,bud	N/A		cellular bud neck, cellular bud tip, exocyst, incipient cellular bud site, plasma membrane
	YMR124W	YMR124W	ambiguous,bud neck,cytoplasm,cell periphery,bud	N/A		cytoplasm*
	YBR102C	EXO84	ambiguous,bud neck,cell periphery,bud	N/A		cellular bud neck, cellular bud tip, exocyst, incipient cellular bud site
	YHR158C	KEL1	ambiguous,bud neck,cell periphery,bud	N/A		cellular bud neck, cellular bud tip, mating projection tip
	YLR166C	SEC10	ambiguous,bud neck,cell periphery,bud	N/A		exocyst
	YGR241C	YAP1802	ambiguous,bud neck,cell periphery,bud	N/A		actin cortical patch
	YDR093W	DNF2	ambiguous,cell periphery,bud	N/A		plasma membrane
	YNL278W	CAF120	bud neck,cytoplasm,cell periphery,bud	N/A		CCR4-NOT complex
	YER149C	PEA2	ambiguous,cell periphery,bud	N/A		actin cap, polarisome
Heights represent log-likelihood ratio from node merging, which are not guarrantied to be larger than inner merge log likelihood ratios						* an high throughput annotation
						** inferred from Huh et al. only
